# Supplementary material
Source: PubMed Central journal article supplement (PMC6656627)
Supplement: NIHMS1531209-supplement-Major_Resource_Table.pdf [file NIHMS1531209-supplement-Major_Resource_Table.pdf]

## Major Resources Tables

### Animals (in vivo studies)

| Species | Vendor or Source | Background Strain                    | Sex             |
|---------|------------------|--------------------------------------|-----------------|
| Mice    | JAX              | C57BL/6J                             | Male and female |
| Mice    | JAX              | ApoE knockout on C57BL/6J background | Male            |
|         |                  |                                      |                 |

### Animal breeding

|                 | Species | Vendor or Source | Background Strain | Other Information |
|-----------------|---------|------------------|-------------------|-------------------|
| Parent - Male   |         |                  |                   |                   |
| Parent - Female |         |                  |                   |                   |

### Antibodies

| Target antigen | Vendor or Source  | Catalog # | Working concentration | Lot # (preferred but not required) |
|----------------|-------------------|-----------|-----------------------|------------------------------------|
| ApoA-I         | Meridian Life Sci | K23001R   | 1 ug/ml               |                                    |
| Beta-actin     | Novus Biologicals | NB600-501 | 0.2 ug/ml             |                                    |
| CD36           | Thermo Fisher     | PA116813  | 1 ug/ml               |                                    |
| FOXA3          | Santa Cruz        | SC-5361   | 1 ug/ml               |                                    |
| Histone        | Cell Signaling    | 9671      | 0.5 ug/ml             |                                    |
| MOMA-2         | Bio-Rad           | MCA519G   | 1 ug/ml               |                                    |
| PON1           | Abcam             | Ab126597  | 1 ug/ml               |                                    |
| SAA1           | R & D Systems     | AF2948    | 1 ug/ml               |                                    |
| SREBP1         | Novus Biologicals | NB600-582 | 1 ug/ml               |                                    |
| Tubulin        | Abcam             | Ab4074    | 0.5 ug/ml             |                                    |

### Cultured Cells

| Name                      | Vendor or Source | Sex (F, M, or unknown) |
|---------------------------|------------------|------------------------|
| HepG2                     | ATCC             | Male                   |
| Mouse primary hepatocytes | PI's lab         | Male                   |
| 293A                      | Invitrogen       | Unknown                |
