# Supplementary material
Source: PubMed Central journal article supplement (PMC6656627)
Supplement: NIHMS1531209-supplement-Supplemental_Material_1.pdf [file NIHMS1531209-supplement-Supplemental_Material_1.pdf]

## Supplementary Information

### **Hepatic Forkhead Box Protein A3 regulates ApoA-I expression, cholesterol efflux and atherogenesis**

Yuanyuan Li<sup>1\*</sup>, Yanyong Xu<sup>1\*</sup>, Kavita Jadhav<sup>1</sup>, Yingdong Zhu<sup>1</sup>, Liya Yin<sup>1</sup>, and Yanqiao Zhang<sup>1\*\*</sup>

<sup>1</sup>Department of Integrative Medical Sciences, Northeast Ohio Medical University, Rootstown, OH, USA 44272

\* Contributed equally to this work.

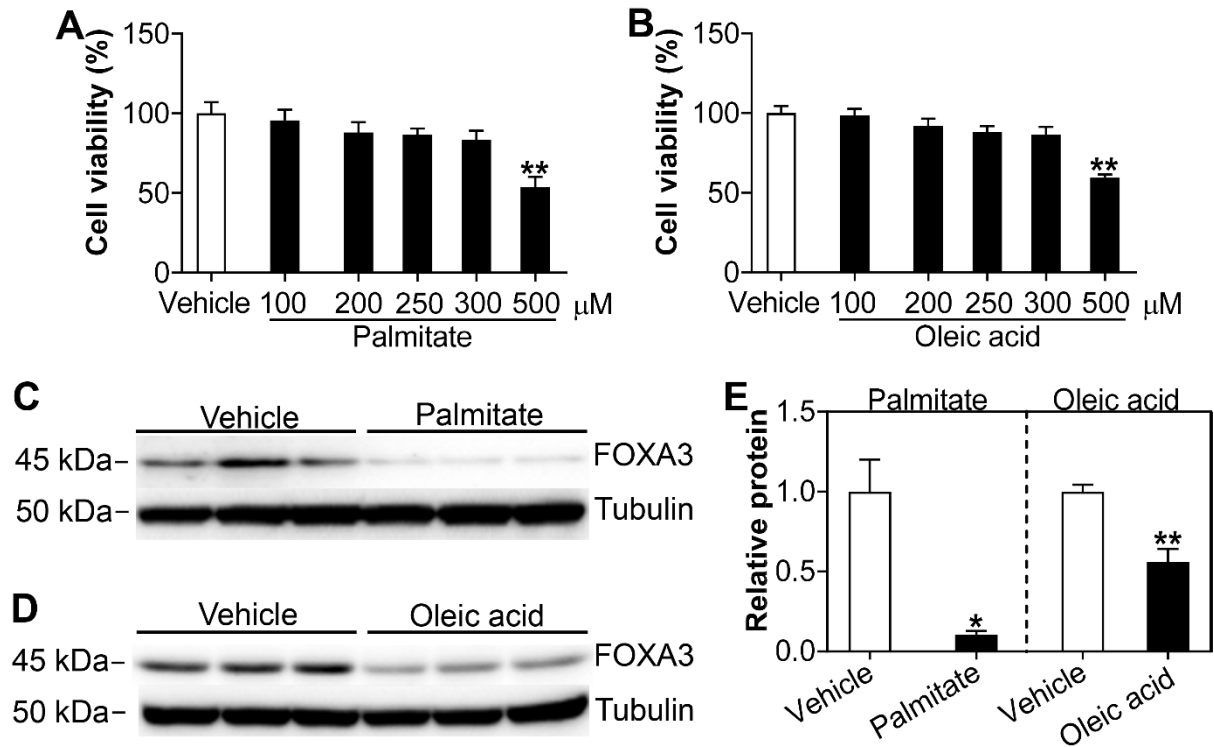

**Supplementary Figure I. Fatty acids reduce FOXA3 protein expression in primary hepatocytes.** **A** and **B**, Mouse primary hepatocytes were treated with various concentrations of palmitate (**A**) or oleic acid (**B**) for 24 h. MTT assays were performed to determine cell viability. **C** and **D**, Mouse primary hepatocytes were treated with 250 μM palmitate acid (**C**) or oleic acid (**D**) for 16 hours, followed by western blot analysis. **E**, Proteins levels in **C** or **D** were quantified. \*  $P < 0.05$ , \*\*  $P < 0.01$

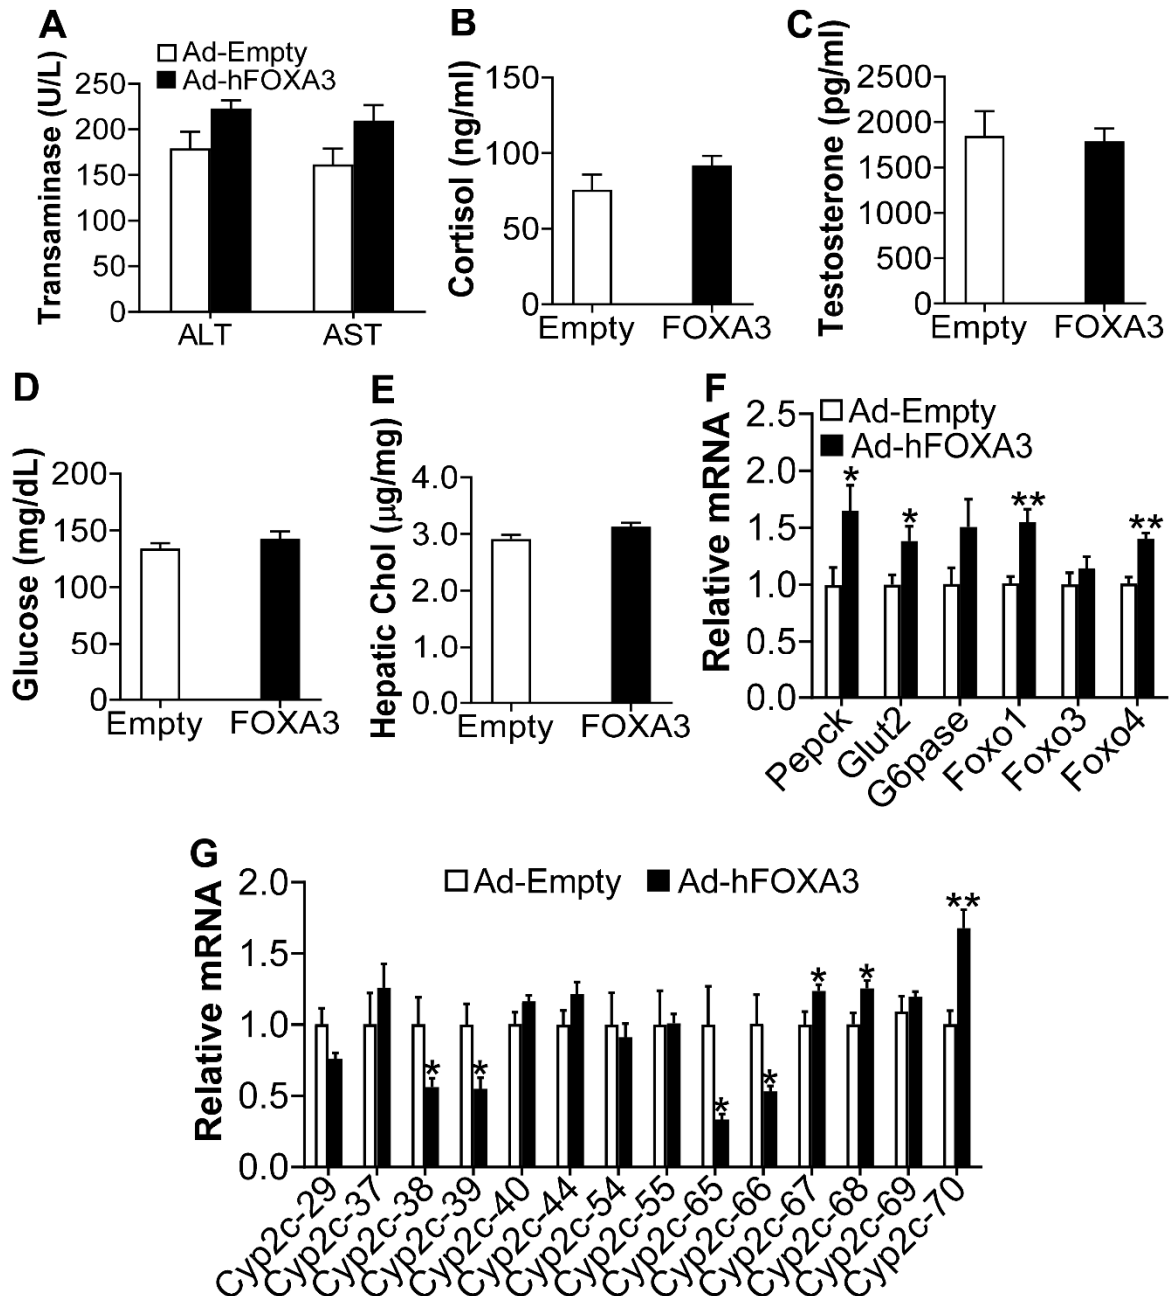

**Supplementary Figure II. Plasma biochemistry, hepatic cholesterol levels, and hepatic mRNA levels in mice over-expressing FOXA3.** C57BL/6J mice were i.v. injected with Ad-Empty or Ad-hFOXA3. Mice were sacrificed 7 days later (n=8 per group). **A**, Plasma ALT and AST levels. **B**, Plasma cortisol levels. **C**, Plasma testosterone levels. **D**, Plasma glucose levels. **E**, Hepatic total cholesterol levels. **F** and **G**, Hepatic mRNA levels. \*  $P < 0.05$ , \*\*  $P < 0.01$

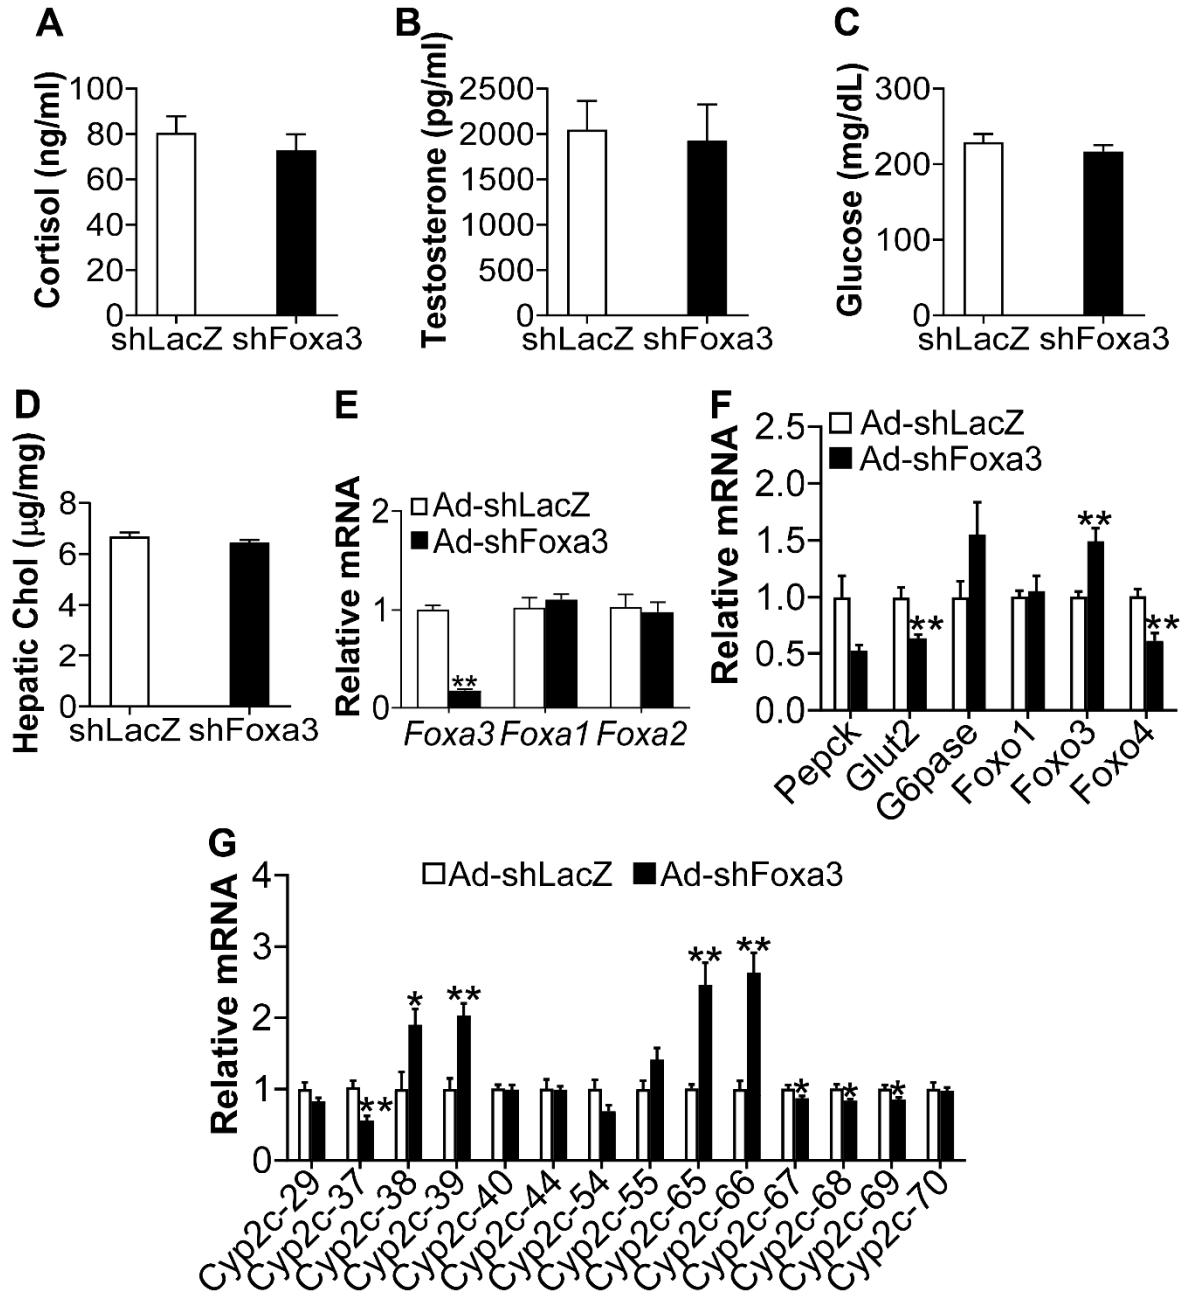

**Supplementary Figure III. Plasma biochemistry, hepatic cholesterol levels, and hepatic mRNA levels in mice with deficiency in hepatic Foxa3.** C57BL/6J mice were i.v. injected with Ad-shLacZ or Ad-shFoxa3 (n=8 per group). Mice were sacrificed 7 days later. **A**, Plasma cortisol levels. **B**, Plasma testosterone levels. **C**, Plasma glucose levels. **D**, Hepatic cholesterol levels. **E-G**, Hepatic mRNA levels. \*  $P < 0.05$ . \*\*  $P < 0.01$

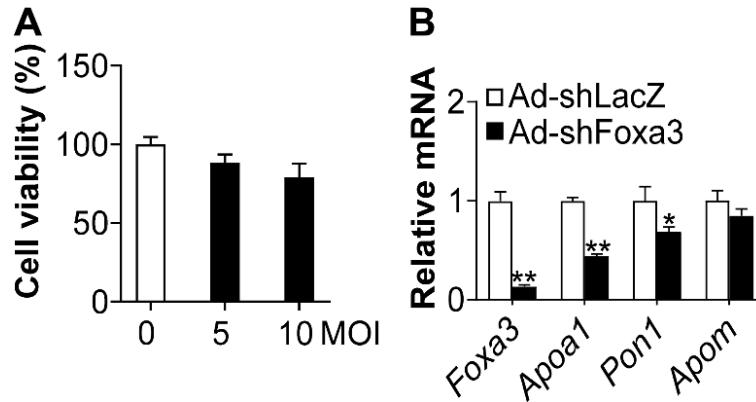

**Supplementary Figure IV. Knockdown of *Foxa3* reduces *Apoa1* and *Pon1* expression in primary hepatocytes.** Mouse primary hepatocytes were infected with Ad-shLacZ or Ad-shFoxa3 for 24 h. **A**, Cell viability was determined by MTT assays when primary hepatocytes were infected with adenoviruses at an MOI of 0, 5 or 10 (n=7). **B**, mRNA levels were determined in primary hepatocytes infected with adenoviruses at an MOI of 10. \*  $P < 0.05$ . \*\*  $P < 0.01$

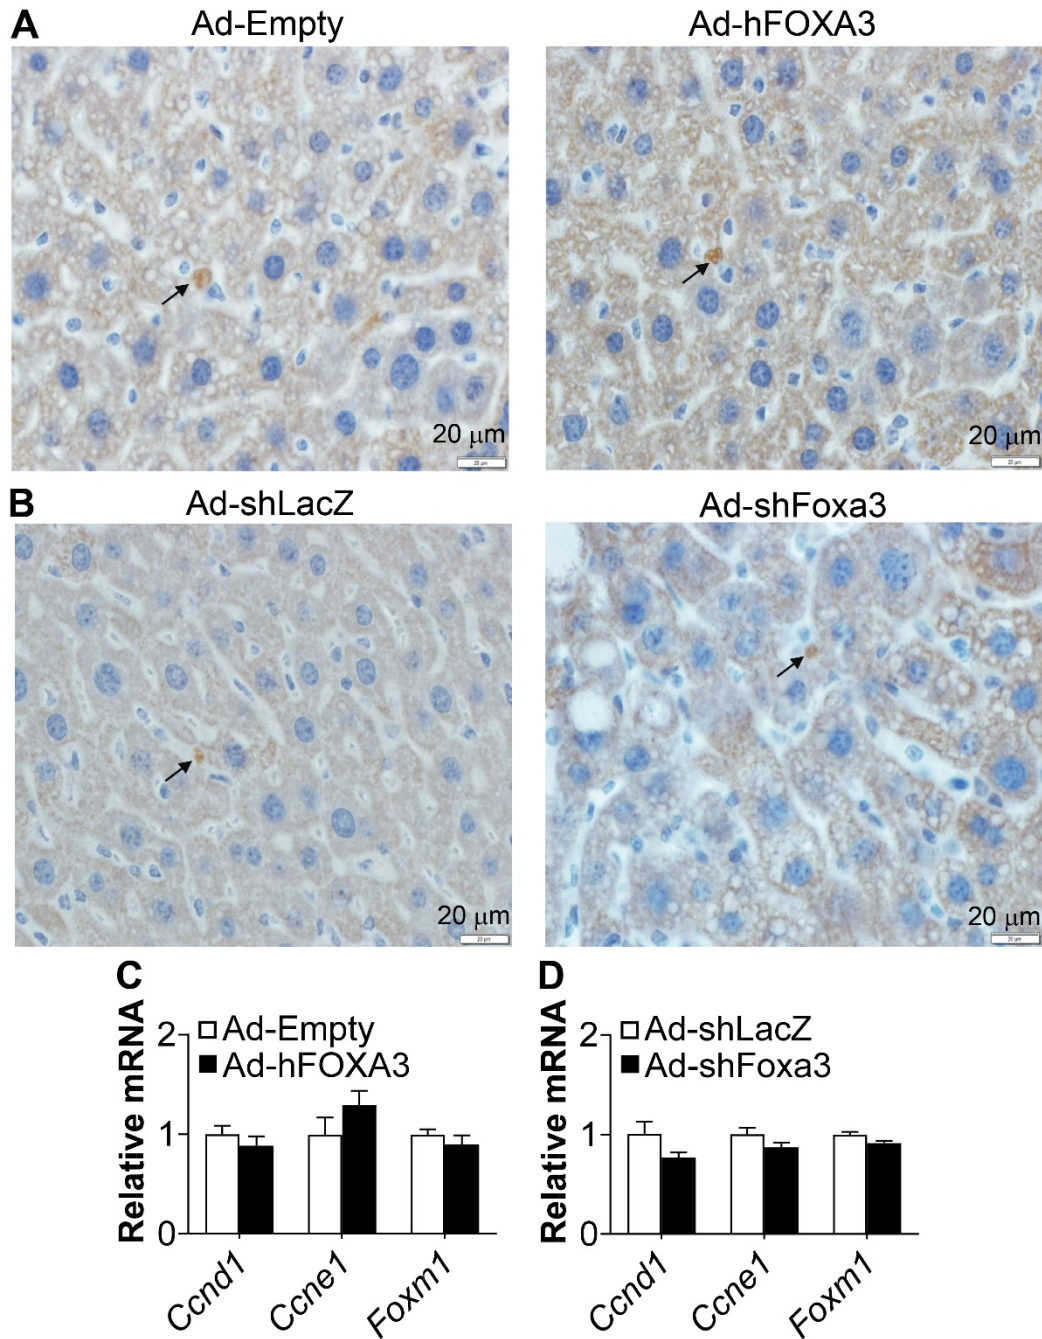

**Supplementary Figure V. FOXA3 over-expression or knockdown does not affect liver proliferation in adult mice.** A-D, C57BL/6J mice were i.v. injected with Ad-Empty, Ad-hFOXA3 (A, C), Ad-shLacZ or Ad-shFoxa3 (B, D) (n=8 per group). After 7 days, livers were collected. Liver sections were immunostained with a Ki-67 antibody (A, B). Hepatic mRNA levels were determined (C, D). Arrows indicate Ki-67 staining-positive cells.

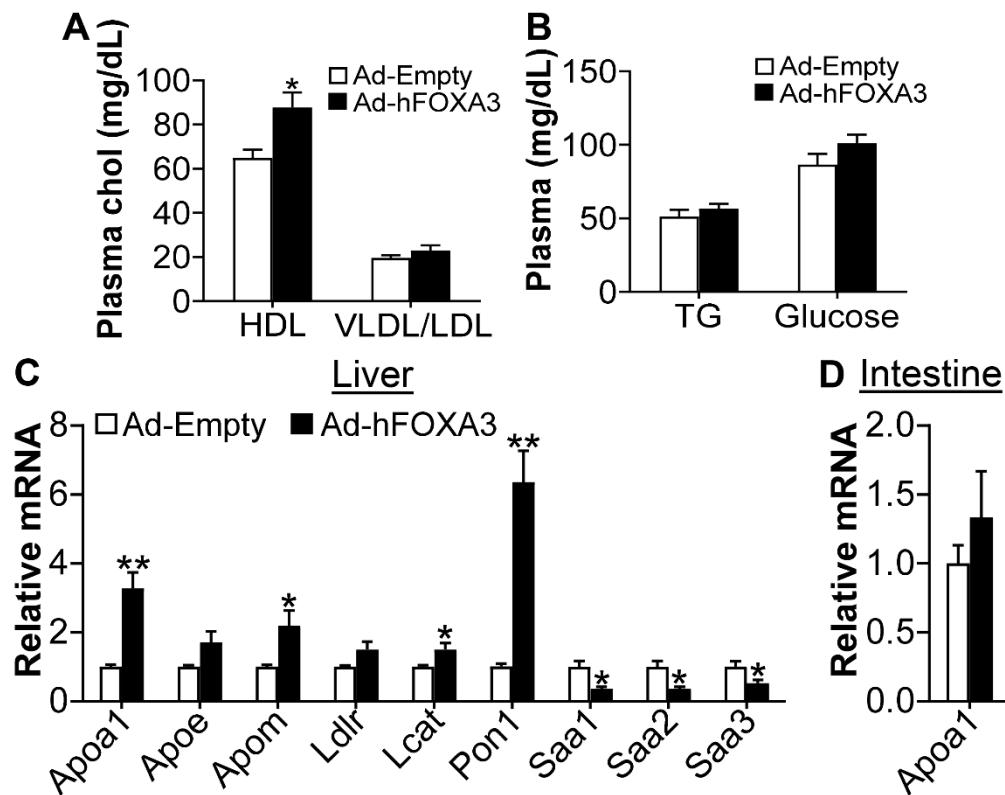

**Supplementary Figure VI. Effect of hepatic FOXA3 over-expression in female mice.** C57BL/6J mice were i.v. injected with Ad-Empty or Ad-hFOXA3 (n=6 per group). After 7 days, mice were euthanized. **A**, Plasma cholesterol levels. **B**, Plasma TG and glucose levels. Glucose levels were determined after a 12-h fast. **C**, Hepatic mRNA levels. **D**, Intestinal *Apoa1* mRNA levels. \*  $P < 0.05$ . \*\*  $P < 0.01$

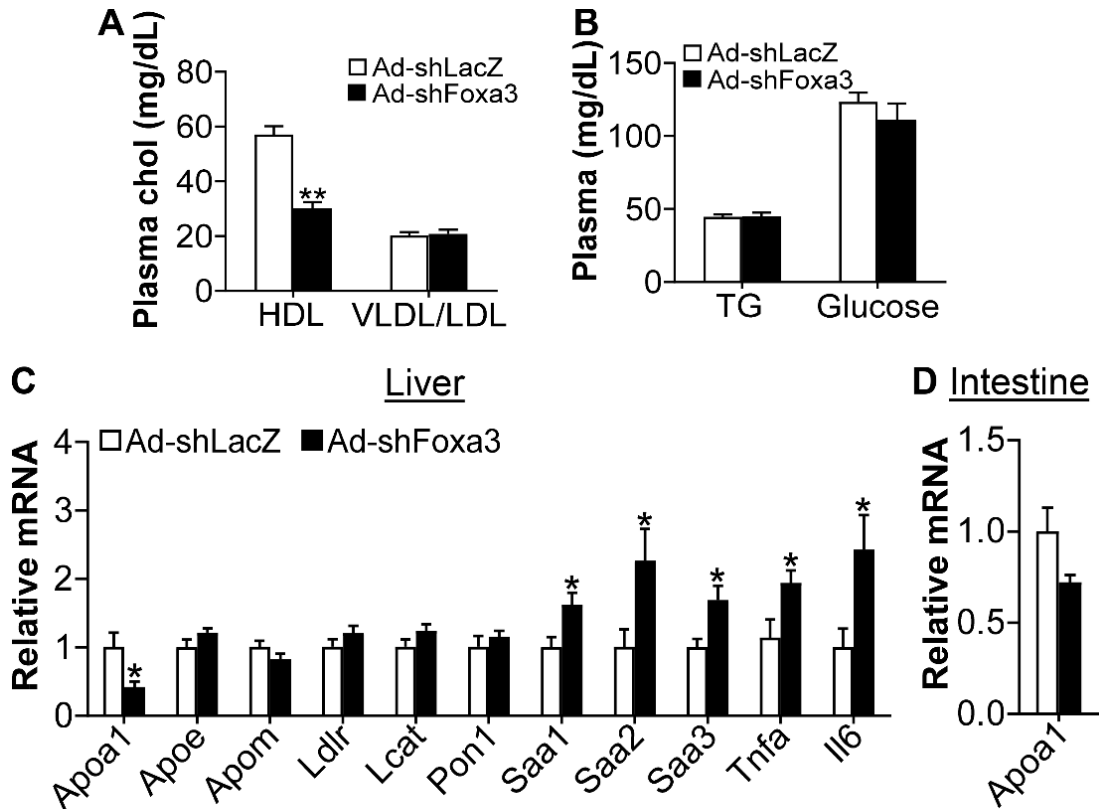

**Supplementary Figure VII. Effect of hepatic FOXA3 knockdown in female mice.** C57BL/6J mice were i.v. injected with Ad-shLacZ or Ad-shFoxa3 (n=6 per group). After 7 days, mice were euthanized. **A**, Plasma cholesterol levels. **B**, Plasma TG and glucose levels. Glucose levels were determined after a 12-h fast. **C**, Hepatic mRNA levels. **D**, Intestinal *Apoa1* mRNA levels. \*  $P < 0.05$ . \*\*  $P < 0.01$



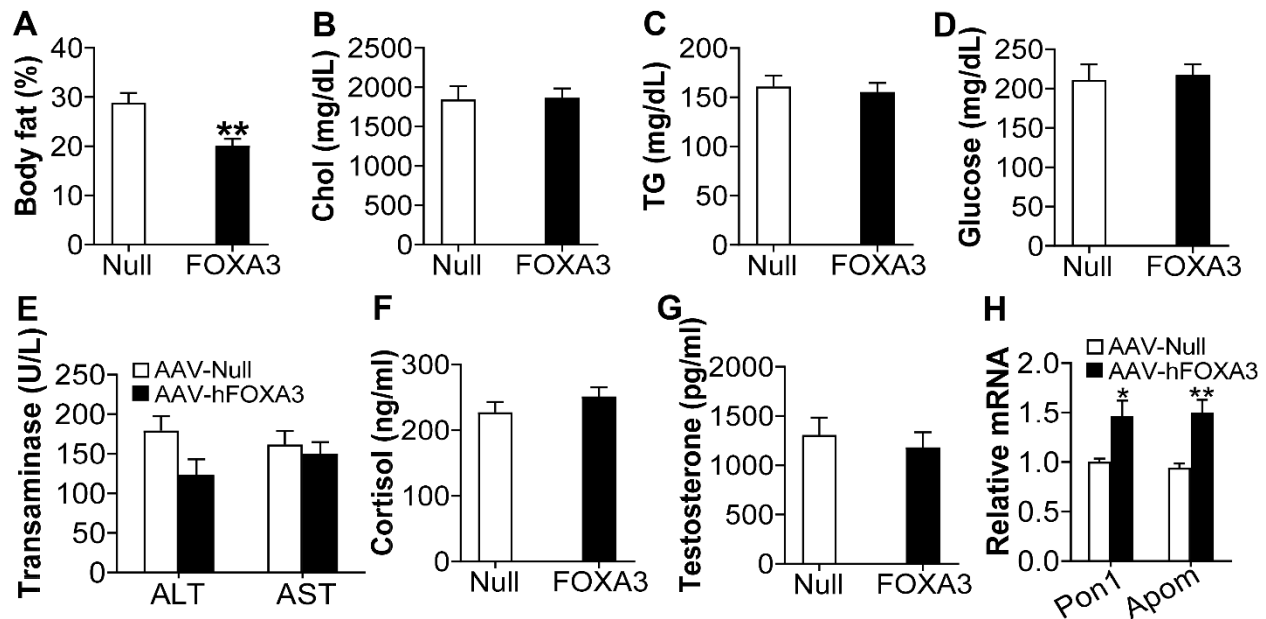

**Supplementary Figure VIII. Hepatocyte-specific over-expression of FOXA3 lowers body fat but does not affect plasma total cholesterol or triglyceride levels.** *ApoE*<sup>-/-</sup> mice were i.v. injected with AAV8-ALB-Null or AAV8-ALB-FOXA3 and then fed a Western diet for 3 months (n=8 per group). **A**, Body fat content was determined by Echo-MRI. No change in food intake was observed. **B**, Plasma total cholesterol (chol) levels. **C**, Plasma triglyceride (TG) levels. **D**, Plasma glucose levels. **E**, Plasma ALT and AST levels. **F**, Plasma cortisol levels. **G**, Plasma testosterone levels. **H**, Hepatic mRNA levels. \*  $P < 0.05$ , \*\*  $P < 0.01$
